# Supplementary material
Source: publisher figshare collection journal article supplement (https://rs.figshare.com/ndownloader/files/24193139)
Supplement: Supplementary file 1 [file 24193139]

## Sheet: Sheet1
Supplementary Material for:
No, you go first: effects of phenotype and social context on neophobia in the house sparrow
Kelly, T. R.1, Kimball, M. G.1, Stansberry, K. R.1, and Lattin, C. R.1
1 Biological Sciences Department, Louisiana State University, Baton Rouge, Louisiana, USA.
Author for correspondence: christinelattin@lsu.edu
CALCULATING 95% CI for HAZARD RATIOS
R Output:
SE [se(coef)] reported is for the coefficient [coef], which is the beta parameter. The beta parameter represents the log of the hazard ratio [exp(coef)].
Therefore, SEs need to be multiplied by 1.96 then added and subtracted from *Beta* (not the hazard ratio). Then exponentiate the upper and lower limits (e = 2.71828182845904).
Table 1 - control (no object) trials
	Beta	SE(coef)	1.96*SE	B + (1.96*SE)	B - (1.96*SE)	Upper 95% CI	Lower 95% CI
Control pairs; week 3	-0.41	0.34	0.6664	0.2564	-1.0764	1.29227	0.34082
Control pairs; week 5	-0.13	0.35	0.686	0.556	-0.816	1.74368	0.442197
Paired with less neo; week 3	-0.53	0.43	0.8428	0.3128	-1.3728	1.36725	0.253396
Paired with less neo; week 5	0.13	0.4	0.784	0.914	-0.654	2.49428	0.519962
Paired with more neo; week 3	-0.46	0.43	0.8428	0.3828	-1.3028	1.46638	0.27177
Paired with more neo; week 5	-0.05	0.41	0.8036	0.7536	-0.8536	2.12463	0.425879
Table 2 - novel object trials
	Beta	SE(coef)	1.96*SE	B + (1.96*SE)	B - (1.96*SE)	Upper 95% CI	Lower 95% CI
Control pairs; week 3	-0.67	0.38	0.7448	0.0748	-1.4148	1.07767	0.242974
Control pairs; week 5	0.13	0.31	0.6076	0.7376	-0.4776	2.09091	0.62027
Paired with less neo; week 3	0.51	0.36	0.7056	1.2156	-0.1956	3.37232	0.822341
Paired with less neo; week 5	0.98	0.41	0.8036	1.7836	0.1764	5.95124	1.19292
Paired with more neo; week 3	-1.43	0.41	0.8036	-0.6264	-2.2336	0.534513	0.107142
Paired with more neo; week 5	-0.29	0.38	0.7448	0.4548	-1.0348	1.57586	0.355297
Table S2 - object effects (contrast against no object present)
	Beta	SE(coef)	1.96*SE	B + (1.96*SE)	B - (1.96*SE)	Upper 95% CI	Lower 95% CI
plastic purple egg	-1.93	0.27	0.5292	-1.4008	-2.4592	0.2464	0.0855033
white cover	-0.86	0.24	0.4704	-0.3896	-1.3304	0.677328	0.264371
dish painted red	-1.35	0.24	0.4704	-0.8796	-1.8204	0.414949	0.161961
yellow pipe cleaners	-1.05	0.23	0.4508	-0.5992	-1.5008	0.549251	0.222952
white blinking light	-1.46	0.25	0.49	-0.97	-1.95	0.379083	0.142274
gold bells	-1.2	0.24	0.4704	-0.7296	-1.6704	0.482102	0.188172
tinfoil hood	-0.99	0.23	0.4508	-0.5392	-1.4408	0.583215	0.236738
pink puffs	-1.71	0.24	0.4704	-1.2396	-2.1804	0.2895	0.112996
blue cocktail umbrella	-1.53	0.24	0.4704	-1.0596	-2.0004	0.346594	0.135281
